# Supplementary material
Source: ML conference proceedings conference paper supplement (https://openreview.net/forum?id=5txkAwKd12)
Supplement: supplementary_material [file attachment]

Supplementary Material:

1. The source code, configuration, and dataset are provided through an anonymous Open Science Framework (OSF) link.

[Code and Dataset](#)

2. The MCAR running log is also provided through anonymous OSF Link.

[MCAR Scan Log](#)
